# Supplementary material
Source: PubMed Central journal article supplement (PMC4852454)
Supplement: rsob150243supp1.pdf [file rsob150243supp1.pdf]

Table S1: Strains and plasmids used in this study

| Strain/ plasmid                     | Description                                                                                                                                                                                                 | Source/ reference              |
|-------------------------------------|-------------------------------------------------------------------------------------------------------------------------------------------------------------------------------------------------------------|--------------------------------|
| <i>E. coli</i> DH10B                | $\Delta(\text{ara-leu})$ 7697 <i>araD139 fhuA</i> $\Delta\text{lacX74 galK16 galE15 e14-}\Phi 80\text{dlacZ}\Delta\text{M15 recA1 relA1 endA1 nupG rpsL (StrR) rph spoT1 } \Delta(\text{mrr-hsdRMS-mcrBC})$ | NEB, UK                        |
| <i>E. coli</i> W3110                | F- $\lambda$ -IN( <i>rrnD-rrnE</i> )1 <i>rph-1</i>                                                                                                                                                          | (Bachmann 1996)                |
| <i>E. coli</i> CLM24                | W3110 with the O-antigen ligase, <i>waal</i> , deleted                                                                                                                                                      | (Feldman et al., 2005)         |
| <i>E. coli</i> CLM37                | W3110 with the initial transferase from ECA, <i>wecA</i> , deleted                                                                                                                                          | (Linton et al., 2005)          |
| <i>S. pneumoniae</i> strain 600/62  | Serotype 4 strain                                                                                                                                                                                           | Statens Serum Insitut, Denmark |
| <i>S. pneumoniae</i> strain Ambrose | Serotype 5 strain                                                                                                                                                                                           | Statens Serum Insitut, Denmark |
| <i>S. pneumoniae</i> strain 573/62  | Serotype 8 strain                                                                                                                                                                                           | Statens Serum Insitut, Denmark |
| <i>S. pneumoniae</i> strain 6312    | Serotype 12F strain                                                                                                                                                                                         | Statens Serum Insitut, Denmark |
| pBBR1MCS-3                          | Cloning vector, Tet <sup>R</sup>                                                                                                                                                                            | (Kovach et al., 1995)          |
| pB-4                                | pBBR1MCS-3 containing a 14095 bp region including <i>wciI-fnlC</i> , from <i>S. pneumoniae</i> serotype 4, synthesised by Epoch Life Sciences, cloned into KpnI XbaI sites of the MCS. Tet <sup>R</sup>     | This study                     |
| pB-5                                | pBBR1MCS-3 containing a 13506 bp region including <i>wciI-fnlC</i> , from <i>S. pneumoniae</i> serotype 5, synthesised by GeneWiz, cloned into ApaI site of the MCS. Tet <sup>R</sup> Trim <sup>R</sup>     | This study                     |
| pB-8                                | pBBR1MCS-3 containing a 9085 bp region including <i>wchA-aliA</i> , from <i>S. pneumoniae</i> serotype 8, amplified by PCR, cloned into PstI site of the MCS. Tet <sup>R</sup>                              | This study                     |
| pB-12F                              | pBBR1MCS-3 containing a 16158 bp region including <i>wciI-fnlC</i> , from <i>S. pneumoniae</i> serotype 12F, synthesised by GenScript, cloned into PstI site of the MCS. Tet <sup>R</sup> Trim <sup>R</sup> | This study                     |

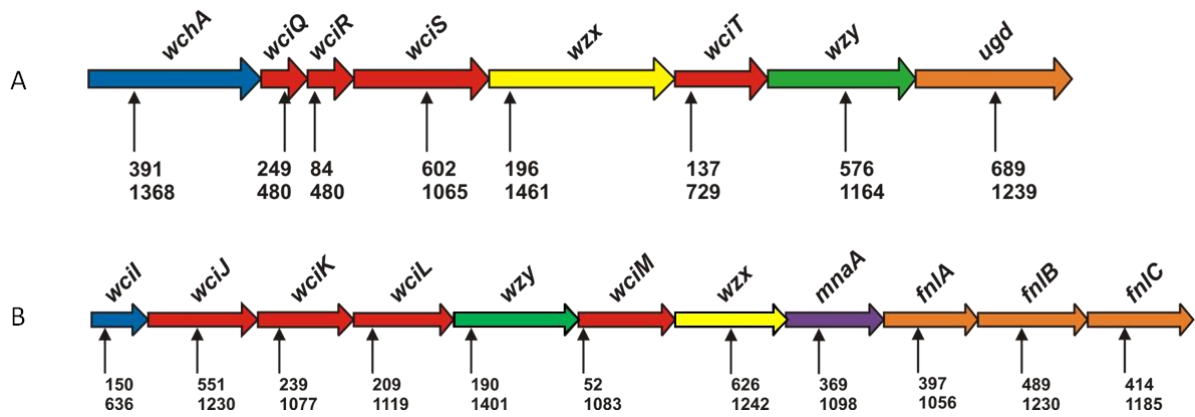

**Supplementary Fig 1. Location of transposon insertion sites within the cloned capsule locus.** A) Transposon location in pB-8, the cloned serotype 8 locus. B) Transposon location in pB-4, the cloned serotype 4 locus. Genes are represented by coloured arrows: undecaprenyltransferase, blue; glycosyltransferases, red; flippase, yellow; polymerase, green; and sugar biosynthesis enzymes, purple or orange. The approximate location of insertion of the transposon is indicated by the vertical black arrows; the top number indicates the insertion site of the transposon in bp from 5' end of the gene, the length of which is shown by the bottom number in bp.
